# Supplementary material
Source: PubMed Central journal article supplement (PMC8522766)
Supplement: web_material_kwab012.pdf [file web_material_kwab012.pdf]

## **Web Material**

### **Sexual Identity Differences in Access to and Satisfaction With Health Care: Findings From Nationally Representative Data**

Jessica N. Fish, Rodman E. Turpin, Natasha D. Williams, and Bradley O. Boekeloo

#### **Table of Contents**

Web Table 1 and 2

**Web Table 1.** Adjusted<sup>a</sup> proportions of health care access/satisfaction and absolute differences across sex and sexual identity(n=30,548): Association of American Medical Colleges biannual Consumer Survey of Health Care Access(2012-2018)

|                                                  | Adjusted Proportions of Health Care Access and Satisfaction |      |          |       | Difference in Proportions (reference Heterosexual) |          |       |
|--------------------------------------------------|-------------------------------------------------------------|------|----------|-------|----------------------------------------------------|----------|-------|
|                                                  | Heterosexual                                                | Gay  | Bisexual | Other | Gay                                                | Bisexual | Other |
| <b>Total Sample</b>                              |                                                             |      |          |       |                                                    |          |       |
| Current Health Insurance                         | 90.0                                                        | 87.3 | 91.8     | 88.2  | -2.7                                               | 1.8      | -1.8  |
| Able to always get needed Health Care            | 86.8                                                        | 79.9 | 80.7     | 70.3  | -6.9                                               | -6.1     | -16.5 |
| Able to not Delay Health Care                    | 71.9                                                        | 70.5 | 67.6     | 57.5  | -1.4                                               | -4.3     | -14.4 |
| Able to get Prescriptions                        | 68.4                                                        | 67.0 | 60.9     | 61.6  | -1.4                                               | -7.5     | -6.8  |
| Able to get Medical Tests                        | 68.0                                                        | 66.0 | 61.9     | 58.5  | -2.0                                               | -6.1     | -9.5  |
| Able to pay for needed Health Care               | 62.8                                                        | 59.0 | 52.8     | 59.7  | -3.8                                               | -10.0    | -3.1  |
| Satisfied with last Health Care visit            | 90.2                                                        | 83.0 | 88.4     | 83.9  | -7.2                                               | -1.8     | -6.3  |
| Would recommend provider to others               | 84.2                                                        | 78.3 | 80.8     | 75.8  | -5.9                                               | -3.4     | -8.4  |
| Never treated unfairly due to Sexual Orientation | 88.2                                                        | 81.1 | 85.6     | 82.0  | -7.1                                               | -2.6     | -6.2  |
| <b>Male</b>                                      |                                                             |      |          |       |                                                    |          |       |
| Current Health Insurance                         | 91.4                                                        | 87.7 | 96.9     | 93.2  | -3.7                                               | 5.5      | 1.8   |
| Able to always get needed Health Care            | 88.6                                                        | 80.6 | 85.9     | 71.7  | -8.0                                               | -2.7     | -16.8 |
| Able to not Delay Health Care                    | 65.9                                                        | 68.5 | 59.3     | 52.1  | 2.6                                                | -6.6     | -13.8 |
| Able to get Prescriptions                        | 65.0                                                        | 65.6 | 52.0     | 56.5  | 0.6                                                | -13.0    | -8.4  |
| Able to get Medical Tests                        | 65.8                                                        | 69.1 | 53.3     | 58.5  | 3.3                                                | -12.5    | -7.2  |
| Able to pay for needed Health Care               | 62.9                                                        | 63.6 | 47.2     | 59.8  | 0.6                                                | -15.7    | -3.1  |
| Satisfied with last Health Care visit            | 92.3                                                        | 85.9 | 92.3     | 87.7  | -6.5                                               | 0.0      | -4.6  |
| Would recommend provider to others               | 86.7                                                        | 81.5 | 88.5     | 76.3  | -5.2                                               | 1.7      | -10.4 |
| Never treated unfairly due to Sexual Orientation | 82.4                                                        | 78.3 | 73.3     | 71.7  | -4.1                                               | -9.1     | -10.7 |
| <b>Female</b>                                    |                                                             |      |          |       |                                                    |          |       |
| Current Health Insurance                         | 89.3                                                        | 89.3 | 89.3     | 84.0  | 0.0                                                | 0.0      | -5.4  |
| Able to always get needed Health Care            | 89.3                                                        | 83.1 | 81.3     | 73.2  | -6.3                                               | -8.0     | -16.1 |
| Able to not Delay Health Care                    | 74.5                                                        | 61.8 | 68.5     | 61.8  | -12.8                                              | -6.0     | -12.7 |
| Able to get Prescriptions                        | 69.8                                                        | 59.3 | 62.8     | 62.1  | -10.5                                              | -7.0     | -7.7  |
| Able to get Medical Tests                        | 68.2                                                        | 51.1 | 63.4     | 55.9  | -17.0                                              | -4.8     | -12.3 |
| Able to pay for needed Health Care               | 62.3                                                        | 46.1 | 54.8     | 61.0  | -16.2                                              | -7.5     | -1.2  |
| Satisfied with last Health Care visit            | 89.0                                                        | 81.0 | 87.2     | 83.6  | -8.0                                               | -1.8     | -5.3  |
| Would recommend provider to others               | 83.4                                                        | 75.1 | 76.7     | 77.6  | -8.3                                               | -6.7     | -5.8  |
| Never treated unfairly due to Sexual Orientation | 92.1                                                        | 76.4 | 91.1     | 89.3  | -15.6                                              | -0.9     | -2.8  |

<sup>a</sup>Proportions adjusted for age, race, education level, annual household income, employment status, marital status, region, and survey wave. All differences statistically significant(p<.05) using Chi-square test.

**Web Table 2.** Unadjusted and adjusted main associations and interaction terms for prevalence of health care access and satisfaction measures (n = 30,548):  
Association of American Medical Colleges biannual Consumer Survey of Health Care Access (2012-2018)

| <b>Unadjusted</b>           | Current Health Insurance | Able to always get needed Health Care | Able to not Delay Health Care  | Able to afford Prescriptions   | Able to afford Medical Tests   | Able to afford needed Health Care | Satisfied with last Health Care visit | Would recommend their provider to others | Never treated unfairly due to Sexual Orientation <sub>a</sub> |
|-----------------------------|--------------------------|---------------------------------------|--------------------------------|--------------------------------|--------------------------------|-----------------------------------|---------------------------------------|------------------------------------------|---------------------------------------------------------------|
|                             | <b>PR(95% CI)</b>        | <b>PR(95% CI)</b>                     | <b>PR(95% CI)</b>              | <b>PR(95% CI)</b>              | <b>PR(95% CI)</b>              | <b>PR(95% CI)</b>                 | <b>PR(95% CI)</b>                     | <b>PR(95% CI)</b>                        | <b>PR(95% CI)</b>                                             |
| Gay                         | 0.99(0.88, 1.11)         | 0.90(0.80, 1.02)                      | 0.77 <sub>b</sub> (0.67, 0.89) | 0.80 <sub>b</sub> (0.69, 0.92) | 0.69 <sub>b</sub> (0.59, 0.81) | 0.69 <sub>b</sub> (0.59, 0.82)    | 0.89(0.79, 1.01)                      | 0.88(0.77, 1.00)                         | 0.80 <sub>b</sub> (0.71, 0.91)                                |
| Bisexual                    | 0.95(0.88, 1.02)         | 0.84 <sub>b</sub> (0.77, 0.91)        | 0.82 <sub>b</sub> (0.75, 0.90) | 0.81 <sub>b</sub> (0.73, 0.89) | 0.82 <sub>b</sub> (0.74, 0.90) | 0.78 <sub>b</sub> (0.70, 0.86)    | 0.93(0.86, 1.01)                      | 0.87 <sub>b</sub> (0.80, 0.95)           | 0.96(0.89, 1.04)                                              |
| Other                       | 0.92(0.79, 1.07)         | 0.79 <sub>b</sub> (0.67, 0.93)        | 0.79 <sub>b</sub> (0.66, 0.94) | 0.86(0.72, 1.02)               | 0.78 <sub>b</sub> (0.65, 0.93) | 0.92(0.77, 1.10)                  | 0.92(0.79, 1.06)                      | 0.90(0.77, 1.05)                         | 0.96(0.83, 1.11)                                              |
| Heterosexual                | Reference                | Reference                             | Reference                      | Reference                      | Reference                      | Reference                         | Reference                             | Reference                                | Reference                                                     |
| Male                        | 1.02(0.99, 1.04)         | 1.02(0.99, 1.04)                      | 0.90 <sub>b</sub> (0.87, 0.92) | 0.94 <sub>b</sub> (0.92, 0.97) | 0.97 <sub>b</sub> (0.94, 0.99) | 0.99(0.96, 1.02)                  | 1.03(1.00, 1.05)                      | 1.02 <sub>b</sub> (1.00, 1.05)           | 0.91 <sub>b</sub> (0.88, 0.93)                                |
| Female                      | Reference                | Reference                             | Reference                      | Reference                      | Reference                      | Reference                         | Reference                             | Reference                                | Reference                                                     |
| Gay*Male                    | 0.94(0.81, 1.08)         | 0.97(0.83, 1.13)                      | 1.37 <sub>b</sub> (1.15, 1.62) | 1.30 <sub>b</sub> (1.09, 1.54) | 1.53 <sub>b</sub> (1.28, 1.83) | 1.46 <sub>b</sub> (1.21, 1.76)    | 1.01(0.87, 1.17)                      | 1.03(0.89, 1.21)                         | 1.24 <sub>b</sub> (1.06, 1.45)                                |
| Bisexual*Male               | 1.09(0.96, 1.23)         | 1.14(1.00, 1.29)                      | 1.01(0.87, 1.18)               | 0.93(0.79, 1.09)               | 0.92(0.78, 1.08)               | 0.90(0.76, 1.07)                  | 1.05(0.93, 1.19)                      | 1.16 <sub>b</sub> (1.02, 1.32)           | 0.90 <sub>b</sub> (0.81, 1.00)                                |
| Other*Male                  | 1.07(0.86, 1.34)         | 0.98(0.77, 1.27)                      | 0.96(0.72, 1.27)               | 1.01(0.77, 1.32)               | 1.11(0.84, 1.46)               | 1.02(0.77, 1.33)                  | 1.00(0.80, 1.26)                      | 0.94(0.74, 1.20)                         | 0.90(0.71, 1.14)                                              |
| <b>Adjusted<sub>c</sub></b> | Current Health Insurance | Able to always get needed Health Care | Able to not Delay Health Care  | Able to afford Prescriptions   | Able to afford Medical Tests   | Able to afford needed Health Care | Satisfied with last Health Care visit | Would recommend their provider to others | Never treated unfairly due to Sexual Orientation <sub>a</sub> |
|                             | <b>aPR(95% CI)</b>       | <b>aPR(95% CI)</b>                    | <b>aPR(95% CI)</b>             | <b>aPR(95% CI)</b>             | <b>aPR(95% CI)</b>             | <b>aPR(95% CI)</b>                | <b>aPR(95% CI)</b>                    | <b>aPR(95% CI)</b>                       | <b>aPR(95% CI)</b>                                            |
| Gay                         | 1.00(0.89, 1.12)         | 0.93(0.82, 1.05)                      | 0.85(0.74, 0.98)               | 0.85(0.73, 0.98)               | 0.75 <sub>b</sub> (0.64, 0.87) | 0.74 <sub>b</sub> (0.63, 0.87)    | 0.91(0.81, 1.03)                      | 0.90(0.79, 1.02)                         | 0.83 <sub>b</sub> (0.73, 0.94)                                |
| Bisexual                    | 1.00(0.93, 1.08)         | 0.91(0.83, 0.99)                      | 0.92(0.84, 1.01)               | 0.90 <sub>b</sub> (0.82, 0.99) | 0.93(0.85, 1.03)               | 0.88 <sub>b</sub> (0.79, 0.97)    | 0.98(0.91, 1.06)                      | 0.92(0.85, 1.01)                         | 0.99(0.91, 1.07)                                              |
| Other                       | 0.94(0.81, 1.10)         | 0.82(0.70, 0.97)                      | 0.83(0.69, 0.99)               | 0.89(0.75, 1.06)               | 0.82 <sub>b</sub> (0.68, 0.98) | 0.98(0.82, 1.17)                  | 0.94(0.81, 1.09)                      | 0.93(0.80, 1.09)                         | 0.97(0.84, 1.12)                                              |
| Heterosexual                | Reference                | Reference                             | Reference                      | Reference                      | Reference                      | Reference                         | Reference                             | Reference                                | Reference                                                     |
| Male                        | 0.99(0.96, 1.01)         | 0.99(0.96, 1.01)                      | 0.91 <sub>b</sub> (0.89, 0.94) | 0.95 <sub>b</sub> (0.93, 0.98) | 0.95 <sub>b</sub> (0.93, 0.98) | 0.98(0.95, 1.01)                  | 1.01(0.98, 1.03)                      | 0.98(0.95, 1.01)                         | 0.93 <sub>b</sub> (0.91, 0.96)                                |
| Female                      | Reference                | Reference                             | Reference                      | Reference                      | Reference                      | Reference                         | Reference                             | Reference                                | Reference                                                     |
| Gay*Male                    | 0.96(0.83, 1.11)         | 0.99(0.85, 1.15)                      | 1.24 <sub>b</sub> (1.05, 1.47) | 1.18 <sub>b</sub> (1.00, 1.40) | 1.18 <sub>b</sub> (1.00, 1.40) | 1.39 <sub>b</sub> (1.16, 1.66)    | 1.05(0.90, 1.23)                      | 1.35 <sub>b</sub> (1.11, 1.63)           | 1.15 <sub>b</sub> (1.00, 1.32)                                |
| Bisexual*Male               | 1.05(0.93, 1.19)         | 1.08(0.95, 1.23)                      | 0.90(0.78, 1.05)               | 0.84 <sub>b</sub> (0.72, 0.99) | 0.84 <sub>b</sub> (0.72, 0.99) | 0.81 <sub>b</sub> (0.69, 0.95)    | 1.12(0.98, 1.28)                      | 0.82 <sub>b</sub> (0.69, 0.98)           | 0.86 <sub>b</sub> (0.75, 0.99)                                |
| Other*Male                  | 1.08(0.86, 1.35)         | 0.98(0.76, 1.26)                      | 0.94(0.71, 1.25)               | 0.98(0.75, 1.28)               | 0.98(0.75, 1.28)               | 1.08(0.82, 1.42)                  | 0.94(0.74, 1.20)                      | 0.96(0.73, 1.26)                         | 0.89(0.70, 1.14)                                              |

<sub>a</sub>Total n = 28,463 for this measure due to measurement starting one wave later than all other measures.

<sub>b</sub>Statistically significant estimates(p<.05).

<sub>c</sub>Models adjusted for sex, age, race, education level, annual household income, employment status, marital status, region, and survey wave.
